# Supplementary material for: The utility of DNA extracted from saliva for genome-wide molecular research platforms
Source: BMC Res Notes. 2018 Jan 8;11:8. doi: 10.1186/s13104-017-3110-y (PMC5759806; doi:10.1186/s13104-017-3110-y)
Supplement: Supplementary file 1 — Additional file 1: Table S1. Pearson’s correlation coefficient matrix between individual samples. [file 13104_2017_3110_MOESM1_ESM.csv]

	WB_1	Saliva_1	WB_2	Saliva_2	WB_3	Saliva_3	WB_4	Saliva_4	WB_5	Saliva_5	Saliva_10	WB_10	Saliva_9	WB_9	Saliva_8	WB_8	Saliva_7	WB_7	Saliva_6	WB_6	WB_3_replicate	Saliva_3_replicate	Cellline_Cont
WB_1	1	0.980212515	0.991912777	0.979678603	0.991437414	0.980340851	0.989017904	0.978500679	0.99249446	0.983776874	0.870901293	0.931059557	0.982903678	0.99241748	0.979971712	0.991868025	0.959647685	0.990744524	0.974370564	0.982337332	0.99161861	0.980727959	0.43630892
Saliva_1	0.980212515	1	0.974826634	0.991096217	0.976267462	0.98992973	0.973107757	0.974651699	0.976608861	0.98862782	0.932330005	0.90821623	0.988142122	0.9767847	0.990501391	0.974028422	0.988215399	0.975790481	0.985057618	0.9713408	0.976398015	0.99092837	0.421038232
WB_2	0.991912777	0.974826634	1	0.985174143	0.991828793	0.980225736	0.98885707	0.97701297	0.991692246	0.983403908	0.871516267	0.934453177	0.981873174	0.991748989	0.980087862	0.992057809	0.959447987	0.990553937	0.973586019	0.981772444	0.991740863	0.980540575	0.446091984
Saliva_2	0.979678603	0.991096217	0.985174143	1	0.9811342	0.990485963	0.97745979	0.979024713	0.981393665	0.990937853	0.917453847	0.910950174	0.989999189	0.981548966	0.991319188	0.979062729	0.983029059	0.980601264	0.985597894	0.97660105	0.981107085	0.991177187	0.419632577
WB_3	0.991437414	0.976267462	0.991828793	0.9811342	1	0.987842805	0.988519141	0.980003227	0.992050879	0.986044634	0.868944854	0.929857113	0.984118922	0.991917639	0.982013129	0.991504881	0.959752818	0.991113209	0.974708547	0.983105432	0.998212553	0.987949126	0.438934784
Saliva_3	0.980340851	0.98992973	0.980225736	0.990485963	0.987842805	1	0.977710037	0.980344949	0.982306707	0.991129401	0.912821133	0.914183076	0.990137528	0.982138828	0.991414548	0.980365523	0.981811702	0.982649313	0.984032943	0.976928102	0.988035485	0.997365527	0.421243902
WB_4	0.989017904	0.973107757	0.98885707	0.97745979	0.988519141	0.977710037	1	0.98861385	0.988409743	0.981434772	0.868810374	0.930262864	0.980557605	0.989067656	0.977437366	0.987752372	0.957087127	0.987607526	0.972112487	0.979789245	0.98852411	0.978249237	0.440624377
Saliva_4	0.978500679	0.974651699	0.97701297	0.979024713	0.980003227	0.980344949	0.98861385	1	0.980485222	0.984134818	0.865897854	0.905294986	0.984355192	0.981014164	0.979853394	0.976875958	0.95780464	0.980750949	0.975241467	0.978238027	0.980554265	0.980396244	0.403669256
WB_5	0.99249446	0.976608861	0.991692246	0.981393665	0.992050879	0.982306707	0.988409743	0.980485222	1	0.990914688	0.870202269	0.927062557	0.98450258	0.99256852	0.981554633	0.99177267	0.960372557	0.991180445	0.975047483	0.982953677	0.992047684	0.982365778	0.430062119
Saliva_5	0.983776874	0.98862782	0.983403908	0.990937853	0.986044634	0.991129401	0.981434772	0.984134818	0.990914688	1	0.898823413	0.912712333	0.991699779	0.985810248	0.990848983	0.982756591	0.976434491	0.985112292	0.984682622	0.981107624	0.98597767	0.991472403	0.416125781
Saliva_10	0.870901293	0.932330005	0.871516267	0.917453847	0.868944854	0.912821133	0.868810374	0.865897854	0.870202269	0.898823413	1	0.832949387	0.899234795	0.870383743	0.914756586	0.870131422	0.957792366	0.869828394	0.908674932	0.860876139	0.869213899	0.91489704	0.410907294
WB_10	0.931059557	0.90821623	0.934453177	0.910950174	0.929857113	0.914183076	0.930262864	0.905294986	0.927062557	0.912712333	0.832949387	1	0.910740443	0.928143911	0.911128131	0.931385321	0.900143444	0.930414152	0.905574052	0.914248466	0.930206059	0.913981707	0.518748391
Saliva_9	0.982903678	0.988142122	0.981873174	0.989999189	0.984118922	0.990137528	0.980557605	0.984355192	0.98450258	0.991699779	0.899234795	0.910740443	1	0.990110553	0.9903014	0.981377581	0.976544559	0.984106061	0.985365522	0.98073381	0.984634521	0.990820331	0.413767044
WB_9	0.99241748	0.9767847	0.991748989	0.981548966	0.991917639	0.982138828	0.989067656	0.981014164	0.99256852	0.985810248	0.870383743	0.928143911	0.990110553	1	0.981730719	0.991414623	0.9606324	0.99122096	0.976210784	0.983680776	0.992107682	0.982530109	0.431403137
Saliva_8	0.979971712	0.990501391	0.980087862	0.991319188	0.982013129	0.991414548	0.977437366	0.979853394	0.981554633	0.990848983	0.914756586	0.911128131	0.9903014	0.981730719	1	0.985240855	0.982630404	0.981645736	0.985313873	0.976918943	0.98234732	0.992049832	0.418164741
WB_8	0.991868025	0.974028422	0.992057809	0.979062729	0.991504881	0.980365523	0.987752372	0.976875958	0.99177267	0.982756591	0.870131422	0.931385321	0.981377581	0.991414623	0.985240855	1	0.959009759	0.99083386	0.972581443	0.981113626	0.991666657	0.980381422	0.437839367
Saliva_7	0.959647685	0.988215399	0.959447987	0.983029059	0.959752818	0.981811702	0.957087127	0.95780464	0.960372557	0.976434491	0.957792366	0.900143444	0.976544559	0.9606324	0.982630404	0.959009759	1	0.96513803	0.976395417	0.953834971	0.960168645	0.982831501	0.424604812
WB_7	0.990744524	0.975790481	0.990553937	0.980601264	0.991113209	0.982649313	0.987607526	0.980750949	0.991180445	0.985112292	0.869828394	0.930414152	0.984106061	0.99122096	0.981645736	0.99083386	0.96513803	1	0.975417809	0.983235687	0.991412915	0.982261543	0.433294934
Saliva_6	0.974370564	0.985057618	0.973586019	0.985597894	0.974708547	0.984032943	0.972112487	0.975241467	0.975047483	0.984682622	0.908674932	0.905574052	0.985365522	0.976210784	0.985313873	0.972581443	0.976395417	0.975417809	1	0.989794129	0.975208401	0.98507259	0.4141254
WB_6	0.982337332	0.9713408	0.981772444	0.97660105	0.983105432	0.976928102	0.979789245	0.978238027	0.982953677	0.981107624	0.860876139	0.914248466	0.98073381	0.983680776	0.976918943	0.981113626	0.953834971	0.983235687	0.989794129	1	0.983332254	0.977213769	0.417312752
WB_3_replicate	0.99161861	0.976398015	0.991740863	0.981107085	0.998212553	0.988035485	0.98852411	0.980554265	0.992047684	0.98597767	0.869213899	0.930206059	0.984634521	0.992107682	0.98234732	0.991666657	0.960168645	0.991412915	0.975208401	0.983332254	1	0.988255435	0.43847729
Saliva_3_replicate	0.980727959	0.99092837	0.980540575	0.991177187	0.987949126	0.997365527	0.978249237	0.980396244	0.982365778	0.991472403	0.91489704	0.913981707	0.990820331	0.982530109	0.992049832	0.980381422	0.982831501	0.982261543	0.98507259	0.977213769	0.988255435	1	0.423296256
Cellline_Cont	0.43630892	0.421038232	0.446091984	0.419632577	0.438934784	0.421243902	0.440624377	0.403669256	0.430062119	0.416125781	0.410907294	0.518748391	0.413767044	0.431403137	0.418164741	0.437839367	0.424604812	0.433294934	0.4141254	0.417312752	0.43847729	0.423296256	1
